# Supplementary material for: Plasmid binding to metal oxide nanoparticles inhibited lateral transfer of antibiotic resistance genes
Source: Royal Society of Chemistry journal article supplement (doi:10.1039/c8en01447g), 2019-01-01
Supplement: c8en01447g1.pdf [file c8en01447g1.pdf]

1 **Electronic supplementary information**

2 **Plasmid Binding to Metal Oxide Nanoparticles Inhibited Lateral Transfer of Antibiotic**  
3 **Resistance Genes**

4 Xiaojie Hu,<sup>a</sup> Bing Yang,<sup>a</sup> Wei Zhang,<sup>b</sup> Chao Qin,<sup>a</sup> Xue Sheng,<sup>a</sup> Patryk Oleszczuk,<sup>c</sup> and  
5 Yanzheng Gao<sup>a,\*</sup>

6 <sup>a</sup> Institute of Organic Contaminant Control and Soil Remediation, College of Resources and  
7 Environmental Sciences, Nanjing Agricultural University, Nanjing 210095, P.R. China.

8 <sup>b</sup> Department of Plant, Soil and Microbial Sciences, and Environmental Science and Policy  
9 Program, Michigan State University, East Lansing, Michigan 48824, United States.

10 <sup>c</sup> Department of Environmental Chemistry, University of Maria Skłodowska-Curie, Lublin 20-  
11 031, Poland.

12

13 **\*Corresponding author:** Yanzheng Gao, Address: Weigang Road 1, Nanjing 210095, China.

14 Tel: +86-25-84395019. ORCID No.: 0000-0002-3814-3555. E-mail: gaoyanzheng@njau.edu.cn.

15

16

17

18 **CONTENT:**

19 **S1. Supplemental methods**

20 **S2. Supplemental results**

21 **References**

22

## 23 **S1. Supplemental methods**

### 24 **AFM, SEM, TEM, and FTIR analysis.**

25 **AFM.** The mixtures of plasmids and MONPs were equilibrated at 25°C and 200 rpm for 2 hours.  
26 Afterwards, 20 µL was deposited on a mica surface and dried under nitrogen gas for 20 minutes.  
27 Images of plasmid samples were then obtained by AFM (Dimension Fast Scan; Bruker, Karlsruhe,  
28 Germany).

29 **SEM and TEM.** After mixing at 25°C and 200 rpm for 2 hours, the plasmid and MONP  
30 suspensions were transferred into the culture of competent cells, followed by the same  
31 transformation procedure described in the manuscript. The obtained bacterial suspensions were  
32 centrifuged at 6,000 rpm at 25°C and washed several times to remove residual LB medium.  
33 Glutaraldehyde solution (2.5%) was applied to fix bacterial cells. The cells were dehydrated  
34 through a graded ethanol series, and then coated with gold for SEM (S-3400N; Hitachi, Tokyo,  
35 Japan) or placed onto a carbon-coated copper grid for TEM (JEM-2100; JEOL, Tokyo, Japan).

36 **FTIR.** The plasmids and MONPs were mixed at 25°C and 200 rpm for 2 hours and then freeze-  
37 dried, followed by mixing with KBr on a mass ratio of 1:100 before analysis using a FTIR  
38 spectrometer (Nicolet NEXUS870; Thermo Scientific).

### 39 **Model computation.**

40 **Computational settings.** The generalized gradient approximation (GGA) with the Perdew, Burke,  
41 and Enzerhof (PBE) functional parameters were employed to conduct the model computation,<sup>1</sup> as  
42 carried out in the DMol3 module of the Materials Studio package (Accelrys Software Inc., San  
43 Diego, USA).<sup>2</sup> The geometrical and electronic structures of nanoparticle-base or nanoparticle-  
44 phosphate backbone complexes were computed in periodic boundary conditions (PBC) in density  
45 functional theory (DFT) computation. The global orbital cutoff (fine standard in DMol3) was set

46 at 4.8 Å. The water solvent environment was modeled by applying the conductor-like screening  
47 model (COSMO),<sup>3</sup> and the medium quality mesh size was used for numerical integration. A  $1 \times 1$   
48  $\times 1$  Monkhorst-Pack k-point grid was used to select the Brillouin zone for the structural  
49 optimization. Convergence efficiency was improved by a Fermi smearing of 0.005 hartree (Ha).<sup>4</sup>  
50 **Computational model.** The geometries of the phosphate backbone and four bases of DNA were  
51 structured in ChemBioOffice Software (CambridgeSoft, Cambridge, USA), and the optimized  
52 geometries were calculated by Gaussian 09 with use of the B3LYP/6-311G (d, p) basis sets. The  
53 supercells of Al<sub>2</sub>O<sub>3</sub>NP, ZnONP, and TiO<sub>2</sub>NP were optimized, and the calculated lattice constants  
54 were 1) a = 16.486 Å, c = 37.916 Å, 2) a = 15.616 Å, c = 36.596 Å, and 3) a = 14.795 Å, and c =  
55 39.745 Å, respectively. The most stable surface among the three cleavage planes of  $\alpha$ -Al<sub>2</sub>O<sub>3</sub> (0 0  
56 1), ZnO (0 1 0), and TiO<sub>2</sub> (1 1 0) surface<sup>5-7</sup> was used in this study. The vacuum thickness was set  
57 at 30 Å that was normal to the used surface with the intention to remove fake interactions between  
58 the adsorbate and the periodic image of the bottom layer. Surface hydrogenation of Al<sub>2</sub>O<sub>3</sub>NP and  
59 TiO<sub>2</sub>NP will occur and reactive surface sites are formed.<sup>6, 7</sup> The test calculations with a larger  
60 orbital cutoff (5.2 Å) and denser k-point sampling ( $2 \times 2 \times 1$ ) showed no alteration in energetic or  
61 structural properties. These tests confirmed that the settings and models for model computation in  
62 our experiment were credible enough to express the attributes of the phosphate backbone and four  
63 bases of DNA on the surfaces of MONPs. The weak interaction between molecules was mainly  
64 analyzed by the Independent Gradient Model method.<sup>8</sup> Results were analyzed using VMD 1.93  
65 software, Multiwfn Analyzer,<sup>9</sup> and Origin 2016 software.

66

67 **S2. Supplemental results**

68 **Table S1.** General properties of test metal oxide nanoparticles in this study.

| Particles                         | Average primary particle diameter (nm) | Hydrodynamic <sup>a</sup> diameter (nm) | Zeta potential in <sup>a</sup> deionized water (mV) | Purity (%) |
|-----------------------------------|----------------------------------------|-----------------------------------------|-----------------------------------------------------|------------|
| ZnONP                             | 30 ± 10                                | 102.40 ± 4.67                           | -12.27 ± 1.50                                       | 99.9       |
| Al <sub>2</sub> O <sub>3</sub> NP | 30                                     | 110.06 ± 20.14                          | 8.85 ± 1.23                                         | 99.9       |
| TiO <sub>2</sub> NP (Rutile)      | 50 ± 10                                | 198.60 ± 19.09                          | -19.80 ± 0.72                                       | 99.8       |

69 <sup>a</sup> Hydrodynamic diameter and zeta potential of MONPs (100 mg L<sup>-1</sup>) were both determined in deionzed  
70 water using Malvern Zetasizer nano series-Nano ZS90.

71

72 **Table S2.** Properties of metal oxide nanoparticles after binding with plasmids.

| Particles                         | Hydrodynamic <sup>b</sup> diameter (nm) | Zeta potential in <sup>b</sup> deionized water (mV) |
|-----------------------------------|-----------------------------------------|-----------------------------------------------------|
| ZnONP                             | 190.90 ± 0.99                           | -16.10 ± 0.71                                       |
| Al <sub>2</sub> O <sub>3</sub> NP | 812.60 ± 110.17                         | -19.17 ± 1.93                                       |
| TiO <sub>2</sub> NP (Rutile)      | 651.63 ± 65.53                          | -20.33 ± 0.15                                       |

73 <sup>b</sup> Hydrodynamic diameter and zeta potential of MONPs (100 mg L<sup>-1</sup>) binding with pUC19 plasmid (25 ng,  
74 at 200 rpm, 25°C, 2 h) were both determined in deionzed water by using Malvern Zetasizer nano series-  
75 Nano ZS90.

76

77 **Table S3.** The identifiable infrared spectral features of plasmid DNA without reacting with  
 78 MONPs and their corresponding functional groups.

| Wavenumber (cm <sup>-1</sup> ) | Functional groups                                                | References |
|--------------------------------|------------------------------------------------------------------|------------|
| 1,064.9                        | stretching vibration of P-O                                      | 10         |
| 1,238.3                        | dissymmetrical stretch vibration of PO <sub>2</sub> <sup>-</sup> | 10         |
| 1,483.5                        | cytosine (C)                                                     | 11         |
| 1,606.2                        | adenine (A)                                                      | 11         |
| 1,649.0                        | thymine (T)                                                      | 11         |
| 1,693.2                        | guanine (G)                                                      | 11         |
| less than 900.0                | “fingerprint” zone                                               | 10         |

79

80

81 **Figure S1.** Transmission electron microscope images of ZnONP (**a**), Al<sub>2</sub>O<sub>3</sub>NP (**b**), and TiO<sub>2</sub>NP  
82 (**c**). MONP solutions were prepared in deionized water and sonicated for 20 minutes in an  
83 ultrasonic bath to disperse the particles. The solution was then added onto a copper grid coated  
84 with carbon to get TEM images (JEM-2100; JEOL, Tokyo, Japan).

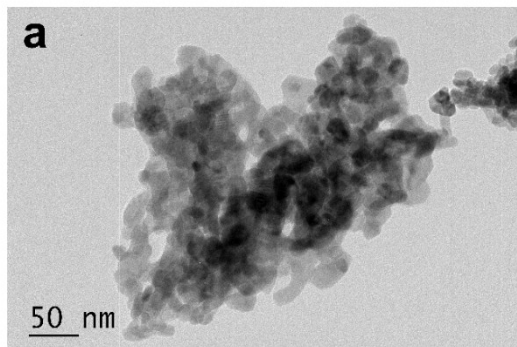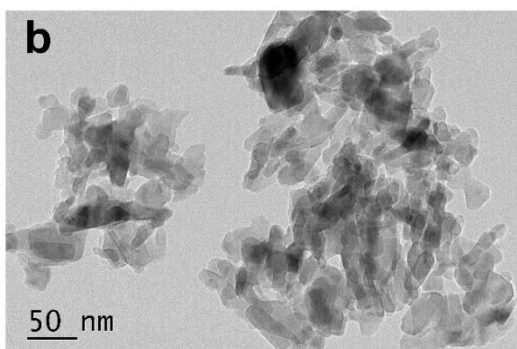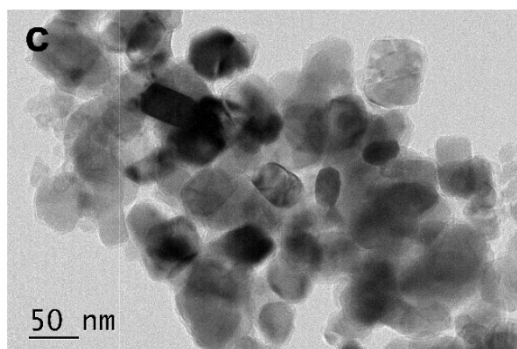

85

86

87 **Figure S2.** Percentages of metal ions released from ZnONP, Al<sub>2</sub>O<sub>3</sub>NP, and TiO<sub>2</sub>NP in deionized  
88 water at pH 7.0 at 25°C. The percentages of metal ions dissolved from MONPs were calculated as  
89 follows:

90 
$$\text{Percentages (\%)} = \frac{\text{molar mass of dissolved metal ions in solution}}{\text{molar mass of metal element in MONPs}} \times 100 \%$$

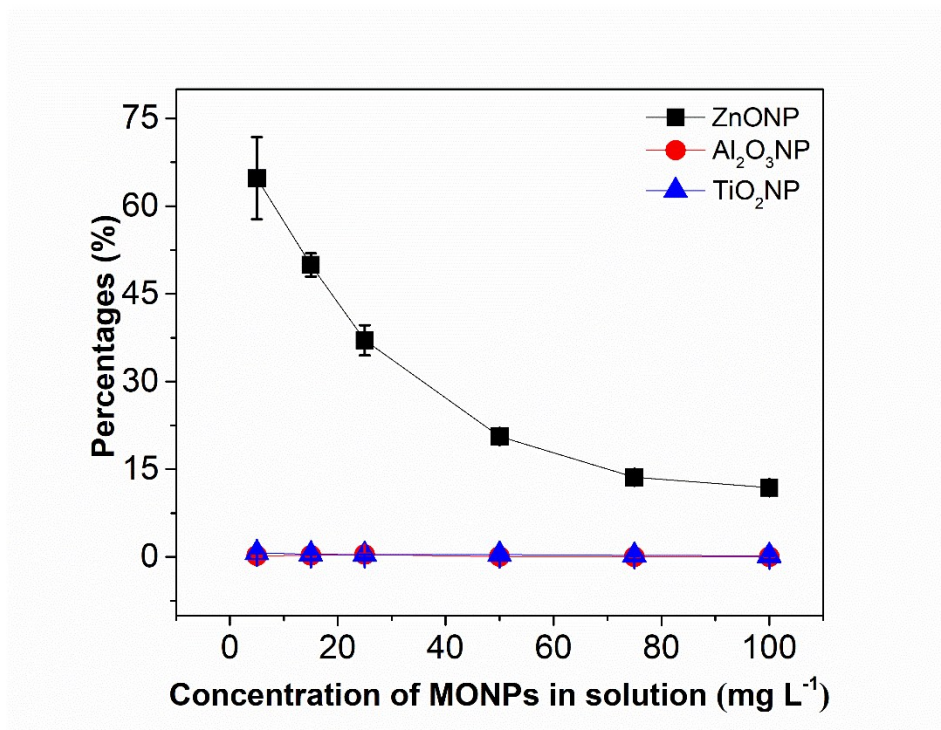

91  
92

93 **Figure S3.** AFM images of TiO<sub>2</sub>NP after reacting with the pUC19 plasmid. The mixtures of  
94 plasmid and TiO<sub>2</sub>NP were incubated at 200 rpm at 25°C for 2 hours, and then 20 μL was deposited  
95 on a mica surface and dried under nitrogen gas for 20 minutes. The images of plasmid samples  
96 were obtained by AFM (Dimension Fast Scan; Bruker, Karlsruhe, Germany).

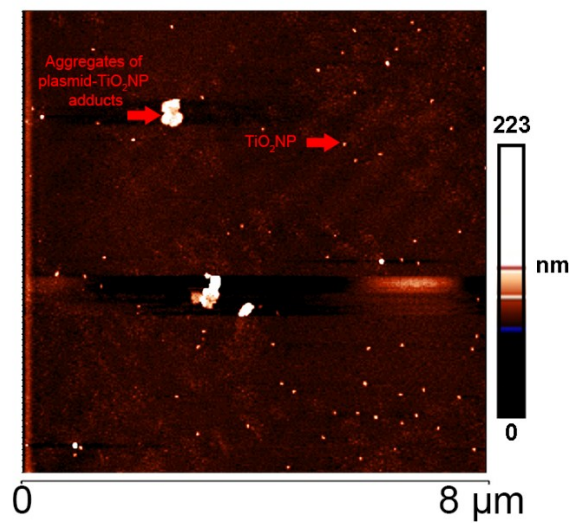

97

98



99 **Figure S4.** FTIR analysis of ZnONP (a), Al<sub>2</sub>O<sub>3</sub>NP (b), and TiO<sub>2</sub>NP (c) before and after binding  
100 with the pUC19 plasmid. FTIR analysis of MONPs in the absence or presence of plasmid was  
101 conducted as follows: The MONP solutions with or without plasmids were incubated at 200 rpm  
102 at 25°C for 2 hours and then freeze-dried. After mixing with KBr (mass ratio of 1:100), the samples  
103 were analyzed by a Nicolet NEXUS870 FTIR spectrometer (Thermo Scientific).

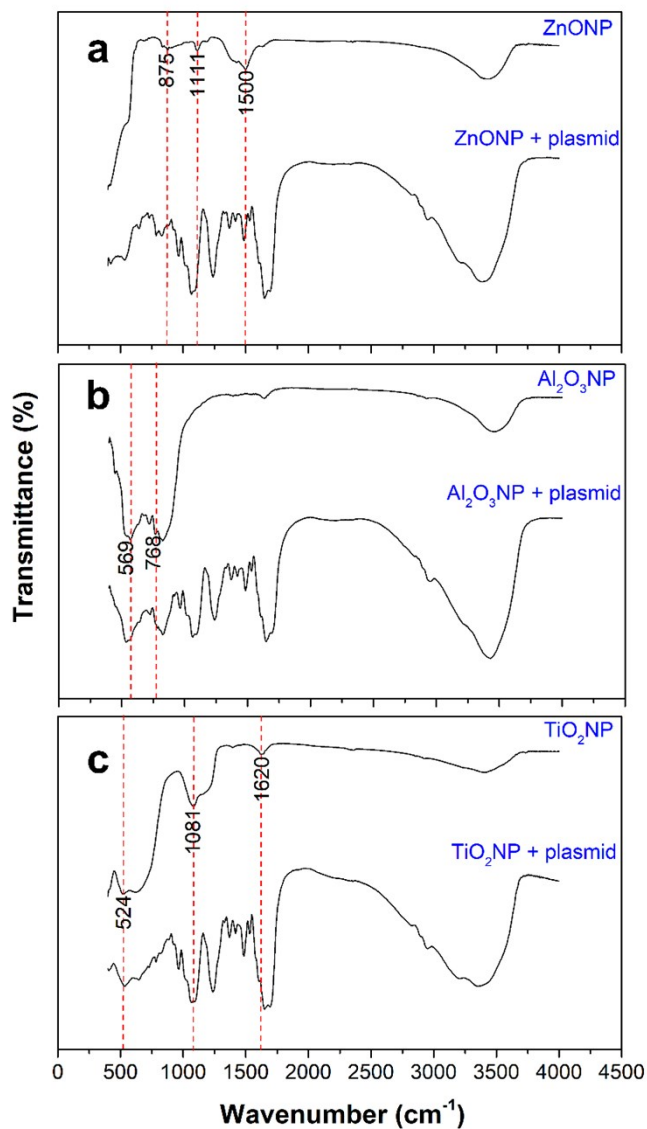

104

105

106 **REFERENCES**

- 107 1. J. P. Perdew, K. Burke and M. Ernzerhof, Generalized gradient approximation made simple,  
108 *Phys. Rev. Lett.*, 1996, **77**, 3865–3868.
- 109 2. B. Delley, An all-electron numerical method for solving the local density functional for  
110 polyatomic molecules, *J. Chem. Phys.*, 1990, **92**, 508–517.
- 111 3. A. Klamt, Conductor-like screening model for real solvents: A new approach to the  
112 quantitative calculation of solvation phenomena, *J. Phys. Chem.*, 1995, **99**, 2224–2235.
- 113 4. B. Delley, in *Theoretical and Computational Chemistry*, eds. J. M. Seminario and P.  
114 Politzer, Elsevier, 1995, vol. 2, pp. 221–254.
- 115 5. Q. Yuan, Y. P. Zhao, L. Li and T. Wang, Ab initio study of ZnO-based gas-sensing  
116 mechanisms: Surface reconstruction and charge transfer, *J. Phys. Chem. C*, 2007, **113**,  
117 6107–6113.
- 118 6. J. D. Kubicki, A. V. Bandura and D. G. Sykes, Adsorption of Water on the TiO<sub>2</sub> (Rutile)  
119 [110] Surface: A DFT Study, 2004.
- 120 7. M. Zhang, G. He and G. Pan, Structure and stability of arsenate adsorbed on  $\alpha$ -Al<sub>2</sub>O<sub>3</sub>  
121 single-crystal surfaces investigated using grazing-incidence EXAFS measurement and  
122 DFT calculation, *Chem. Geol.*, 2014, **389**, 104–109.
- 123 8. C. Lefebvre, G. Rubez, H. Khartabil, J. C. Boisson, J. Contreras-García and E. Hénon,  
124 Accurately extracting the signature of intermolecular interactions present in the NCI plot  
125 of the reduced density gradient versus electron density, *Phys. Chem. Chem. Phys.*, 2017,  
126 **19**, 17928–17936.

- 127 9. T. Lu and F. Chen, Multiwfn: A multifunctional wavefunction analyzer, *J. Comput. Chem.*,  
128 2012, **33**, 580–592.
- 129 10. C. Qin, F. Kang, W. Zhang, W. Shou, X. Hu and Y. Gao, Environmentally-relevant  
130 concentrations of Al(III) and Fe(III) cations induce aggregation of free DNA by  
131 complexation with phosphate group, *Water Res.*, 2017, **123**, 58–66.
- 132 11. D. K. Jangir, G. Tyagi, R. Mehrotra and S. Kundu, Carboplatin interaction with calf-  
133 thymus DNA: A FTIR spectroscopic approach, *J. Mol. Struct.*, 2010, **969**, 126–129.
- 134
